# Supplementary material for: Heterologous Expression of a Thermostable Chitinase from Myxococcus xanthus and Its Application for High Yield Production of Glucosamine from Shrimp Shell
Source: MDPI journal article supplement (doi:10.3390/foods10112808), 2021-11-15
Supplement: s1 [file s1]

## Article

# Heterologous Expression of a Thermostable Chitinase from *Myxococcus xanthus* and Its Application for High Yield Production of Glucosamine from Shrimp Shell

Yongmei Lyu <sup>1,†</sup>, Feng Zheng <sup>2,†</sup>, Chuanxing Qiu <sup>1</sup>, Meng Wang <sup>2</sup>, Dujun Wang <sup>1</sup>, Xiaoyang Zhang <sup>1</sup>, Josef Voglmeir <sup>2</sup>, Li Liu <sup>2,\*</sup> and Xiaohong Yu <sup>1,\*</sup>

<sup>1</sup> School of Marine and Bioengineering, Yancheng Institute of Technology, Yancheng 224051, China; lyu.yongmei@ycit.edu.cn (Y.L.); xq19516560569@163.com (C.Q.); wangdj@ycit.edu.cn (D.W.); zhang.xiaoyang@ycit.edu.cn (X.Z.)

<sup>2</sup> Glycomics and Glycan Bioengineering Research Center (GGBRC), College of Food Science and Technology, Nan-jing Agricultural University, Nanjing 210095, China; 2016108004@njau.edu.cn (F.Z.); 2016208028@njau.edu.cn (M.W.); josef.voglmeir@njau.edu.cn (J.V.)

\* Correspondence: lichen.liu@njau.edu.cn (L.L.); yxh1127@ycit.edu.cn (X.Y.); Tel.: +86-25-8439-9553 (L.L.); +86-515-8829-8960 (X.Y.)

† All authors contributed equally.

**Citation:** Lyu, Y.; Zheng, F.; Qiu, C.; Wang, M.; Wang, D.; Zhang, X.; Voglmeir, J.; Liu, L.; Yu, X. Heterologous Expression of a Thermostable Chitinase from *Myxococcus xanthus* and Its Application for High Yield Production of Glucosamine from Shrimp Shell. *Foods* **2021**, *10*, 2808. <https://doi.org/10.3390/foods10112808>

Academic Editors: Nabil Grimi and Gianpiero Pataro

Received: 7 September 2021

Accepted: 10 November 2021

Published: 15 November 2021

**Publisher's Note:** MDPI stays neutral with regard to jurisdictional claims in published maps and institutional affiliations.

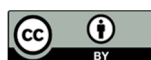

**Copyright:** © 2021 by the authors. Submitted for possible open access publication under the terms and conditions of the Creative Commons Attribution (CC BY) license (<https://creativecommons.org/licenses/by/4.0/>).

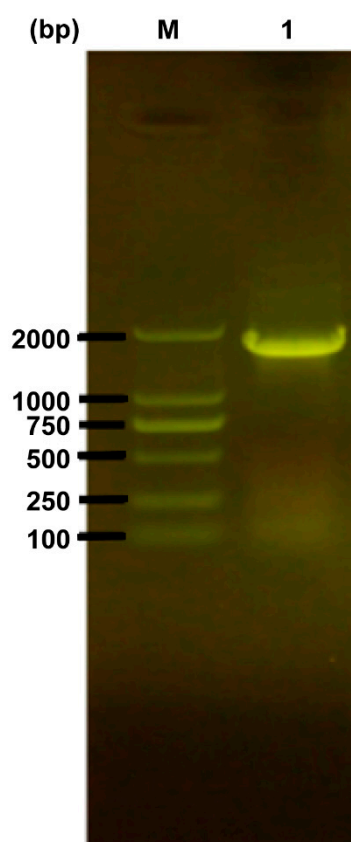

**Figure S1.** Agarose electrophoresis of the amplified MxChi DNA fragment. M: DNA ladder, 1: PCR product of MxChi (theoretical length is 1731 bp).

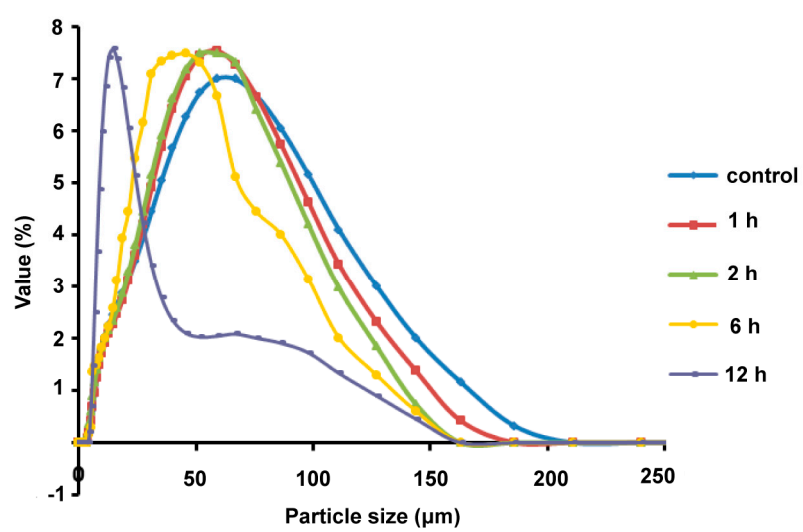

Figure S2. Microscopic changes of MxChi treated colloidal chitin in different time interval.

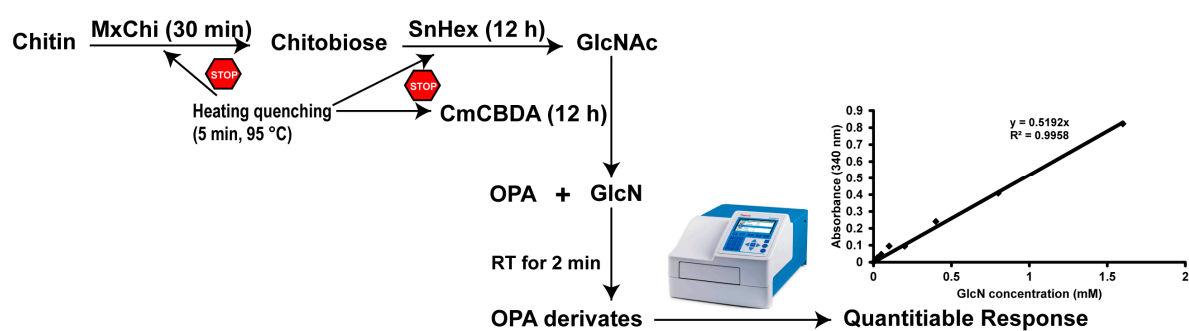

**Figure S3.** Schematic overview of the experimental setup for the microplate reader-based spectrophotometric detection of MxChi activity.

|             |                                                                                     |     |
|-------------|-------------------------------------------------------------------------------------|-----|
| Q1D885 Mx : | -----VPSSSHVRDMTAFQDA :                                                             | 15  |
| P11797 Sm : | MSTRKAVIGYFIPTNQINNYTETDTSVVFPPVSNITPAKAKQLTHINFSFLDINSNLECAWDPATNDAKARDVV----- :   | 75  |
| D6K143 St : | ----- :                                                                             | -   |
| Q81IF9 Bt : | ----- :                                                                             | -   |
| Q873X9 Af : | ----- :                                                                             | -   |
| Q1D885 Mx : | ALAAEWAAGVAVSVGTRVTYQGRLYECRQPHTSQADWTFVAVASLWLDLGPAGGGEFDAGSGGTAGTGGDVTAPTVGLS :   | 95  |
| P11797 Sm : | ----- :                                                                             | -   |
| D6K143 St : | ----- :                                                                             | -   |
| Q81IF9 Bt : | ----- :                                                                             | -   |
| Q873X9 Af : | ----- :                                                                             | -   |
| Q1D885 Mx : | ASASRIIAVGPLSLTATATDDVGTVRVEILENGAVVATGQSQFSAFSGWEQNG---TYVYAVRAYDAAGNVGTTLTVVV :   | 172 |
| P11797 Sm : | ----- :                                                                             | -   |
| D6K143 St : | -----MKYLLPTAAAGLLLLAAQPAMAMATDHSPT :                                               | 30  |
| Q81IF9 Bt : | -----MNH---K-VHHHHHHIEGRHMLGTLEGSE :                                                | 26  |
| Q873X9 Af : | ----- :                                                                             | -   |
| Q1D885 Mx : | EIPGGPPPGKRVG---TA-GI-AR-YHVSINVQPS---KLTHINYAFSNISGD-CR----- :                     | 224 |
| P11797 Sm : | ----- :                                                                             | -   |
| D6K143 St : | VETRAAADNGTVKLG---TE-GT-D---FNVKNLDTSGTAAKITHINYAFGNVTG---CK----- :                 | 85  |
| Q81IF9 Bt : | FKLMDSPKQSQKIVG---PS-GV-G---YQVADIDAS---KLTHLNYPADICWN---KHGPNSTHPDNPKNQYWNCKESGV : | 101 |
| Q873X9 Af : | -----ASSGYRSVV---FVN-AI-G---HNPQDLFVE---RLTHVLYPANVRPET-E----- :                    | 47  |
| Q1D885 Mx : | -----CILGDPFDIDSG---GWQ-E---T-DPGQL-R-CNERAFKEMKRON-HLKLISVGGWST----- :             | 279 |
| P11797 Sm : | -----NR-TAKAHN-S-RIMFSTGGWYSNDLGV :                                                 | 105 |
| D6K143 St : | -----CAIGDSYADYDRAFTADQSVS-QADT---DQPLR-CNENQ-RQAKAY-HI-VLWSEGGWTSW--- :            | 146 |
| Q81IF9 Bt : | PLQNKEVPNGTLVLGEPWADVT-SY---PVS-T-T-EDCDKYARC-NFGE-KR-KAKY-HLKTIIISVGGWTSN--- :     | 171 |
| Q873X9 Af : | -----VIMTDSWADIE-HY-----P-D-S-SDTGNNVY-CIKQ-YL-KKQNRN-LKVLISVGGWTSYSP----- :        | 103 |
| Q1D885 Mx : | ---H-STV-SSPAS-AAV-K-CVDLYIRGQYPGVDPVNGEGVFDGDDIDWEYFVGGGLPGNSNSPADKQNYTL-MQEFPS :  | 356 |
| P11797 Sm : | SHANYVNAVKTAS-AKFA-Q-C-RIMKDYG-----FDGVDIDWEYF-----QAAEVDGFIALQEIET :               | 163 |
| D6K143 St : | ---G-ADA-KDPQG---F-Q-CYNLVHDPRW-----DGVFDCDDIDWEYFNACGLTCDSSGPDARFN---MAALRS :      | 209 |
| Q81IF9 Bt : | ---R-SDM-ADEKT-KVFE-E-TV-AFLRA-Y-----G---FDGVDIDWEYFVGVETIPGGSYRPEDKQNFIL-LQDVVN :  | 236 |
| Q873X9 Af : | ---N-APA-STDAG-KNEFA-KTA-KLLQDLG-----FDGDDIDWEYF-----ENDQQANDEVLLREVRT :            | 159 |
| Q1D885 Mx : | Q-NAVTTQT---GKPYL-TIATGASPDLENK-QETKKLSDV-DWINVMSYDYHCAFEST--VNFHSA-HRVTGDF----- :  | 426 |
| P11797 Sm : | L-NQQTITDGRQALPYQ-TIAGAGGAFFLSRYYSKLAQIVAPIDYINLMYDLACPWKVV--TNHQAA-FGDAAGPTFFYN :  | 241 |
| D6K143 St : | TFGDELVTA---A---VH-ADGTPGGKIE-A-TDYAGAAQYVDWYNVMYIDFFCAWDAQGPTAPHSP-TSYDGE----- :   | 275 |
| Q81IF9 Bt : | A-NKAGAE---GKQYL-TIASGAS-QRYADH-TELKISQIDWINIMYIDFHCGWEAT--SNHNAA-YKDPNDF----- :    | 305 |
| Q873X9 Af : | A-DSYSAANAG-GQHFL-TVASPAGPKIK-V-LHLKMDQDIDFWNLWAYDYACSFSSL--SGHQANVYNDTSNP----- :   | 230 |
| Q1D885 Mx : | -----GAATGE---YTDGSVSKMLA-LGVFPAKI-VGVPEYGRGWGSPVNVNNELFQS-GVF-----T :              | 479 |
| P11797 Sm : | ALREANLGWSWEELTRAFSPESITVDA-VQQLHLMGCVPSAKI-MGVPEYGRAFGVSGGNGCYSSHSTPDEDYPYST :     | 321 |
| D6K143 St : | -----KQGF---TSAD-TAAFKK-OGVPADKLLIGIG-YGRGW-----TGVTDQ-A-PGCTATGPA :                | 325 |
| Q81IF9 Bt : | -----AANTNE---YVDG-INVYTN-EGVPVDRKLVLGVPEYGRGWKSCGKENNGQYQP-CKPGSDGKLAS :           | 365 |
| Q873X9 Af : | -----LSTPE---NTQT-LDLYRA-GGVFANKIVGCM-LYGRSFANT---DG-----PCKPYNGVG :                | 279 |
| Q1D885 Mx : | R---GTDGSSGLTGVDFDKDIKANYERPSCGYTKFFHPEAKEANV-NPATGIWICVDDVQSINAKADYILNKNLGGA :     | 555 |
| P11797 Sm : | DYWLVCCEECVRDKDPRIAS-RO-E-QMLQGNYGQRLWNDKTKTPYL-HAQNGLFVTDYDAESFKYKAKYIKQQQLGGV :   | 400 |
| D6K143 St : | A---GTEQ---GIED-KV-K-N-TCEVTGTV-----AGTAAH-CGSNLW-SYDTPDTIASKMAWANDQGLRGA :         | 385 |
| Q81IF9 Bt : | K---GTDYDSTGDT-VYD-GD-AAANYVNK-NCFVRYWNTAKVPEL-NATTGTFISYDDNESMKYKTDYIKTKGLGGA :    | 440 |
| Q873X9 Af : | Q---GS-EN---GVWDYKA---PQACATEHVLPDIMASHS-DATNKFLLSYDNPQVANLRSYIKSLGLGGA :           | 343 |
| Q1D885 Mx : | FWELSGD----- :                                                                      | 563 |
| P11797 Sm : | FWHLGQD----- :                                                                      | 408 |
| D6K143 St : | FAWDFSGD----- :                                                                     | 393 |
| Q81IF9 Bt : | FWELSGDCTSTPKYSCSGPKLLDTLVKELLGGPINQKDETPPTNVKNIVVTNKNNSVQLNWTASTDNVGVTEYETAG :     | 520 |
| Q873X9 Af : | FWDSGD----- :                                                                       | 351 |

**Figure S4.** Homology alignment of MxChi with chitinase homologues from *Serratia marcescens* (Sm), *Streptomyces thermoviolaceus* (St), *Bacillus thuringiensis* (Bt), and *Aspergillus fumigatus* (Af). The aspartic acid and glutamic acid residues highlighted in red are the proposed catalytic amino acids. Uniprot identifiers are shown with the abbreviation of species.

**Table S1.** Primers for site-directed mutation.

| Gene or Mutation Site | Primer | Sequence                                                    |
|-----------------------|--------|-------------------------------------------------------------|
| D323A                 | F3     | 5'-GTGTTGACGGC <u>ATC</u> GCCATCGACTGGGAGTACCCGGTCGGCGG-3'  |
|                       | F4     | 5'- CCGCCGACCGGGTACTCCCAGTCGAT <u>GGC</u> GATGCCGTCGAACA-3' |
| D325A                 | F5     | 5'-TTCGACGGCATCGAC <u>ATC</u> GCCTGGGAGTACCCGGTCGGCG -3'    |
|                       | F6     | 5'-CGCCGACCGGGTACTCCCAG <u>G</u> GATGTCGATGCCGTCGAA -3'     |
| E327A                 | F7     | 5'-GGCATCGACATCGACTGGG <u>GC</u> CTACCCGGTCGGCGGCGGCC -3'   |
|                       | F8     | 5'-GGCCGCCGCCGACCGGGT <u>AGG</u> CCAGTCGATGTCGATGCC -3'     |

Note: Mutant sites are underlined with solid line.
